# Supplementary material for: Ultrasound-Based Molecular Imaging of Tumors with PTPmu Biomarker-Targeted Nanobubble Contrast Agents
Source: PubMed Central journal article supplement (PMC7922223; doi:10.3390/ijms22041983), 2021-02-17

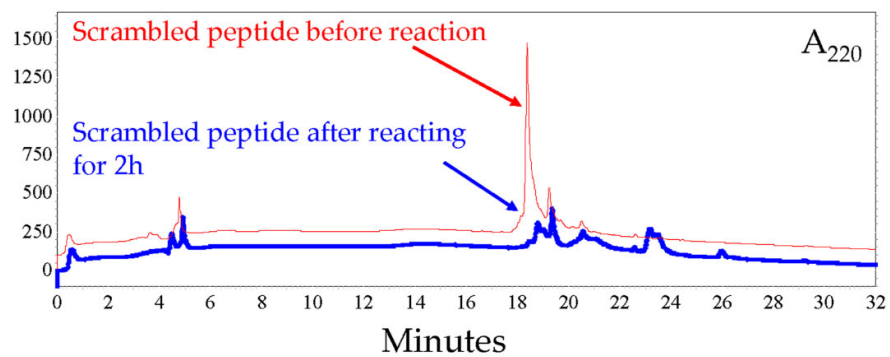

(a)

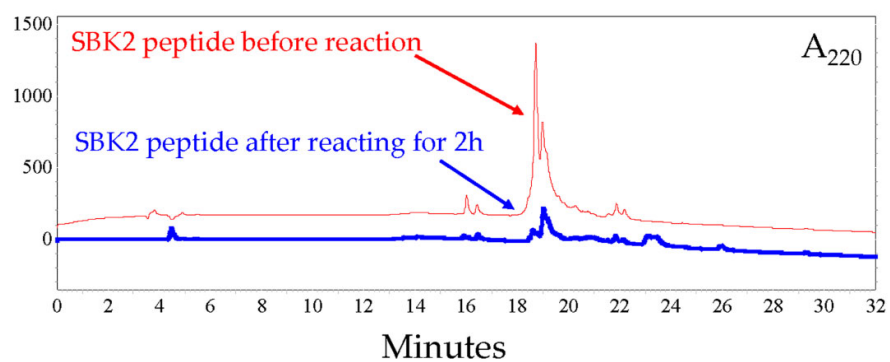

(b)

**Figure S1.** Conjugation of the Scrambled and SBK2 peptides to the lipid DSPE-PEG-maleimide. Chromatograms are shown for representative reactions demonstrating the successful conjugation of the Scrambled peptide (panel a) and the SBK2 (PTP $\mu$  targeting) peptide (panel b) to DSPE-PEG-maleimide. For each reaction, 5  $\mu$ L injections of a 1:4 dilution of the reaction mixture at the start (red tracing) and after 2 h (blue tracing) are shown. For both reactions, only trace amounts of either peptide (RT = ~18 min) remained after 2 h indicating that both the Scrambled and SBK2 peptides had been successfully conjugated to the lipid.

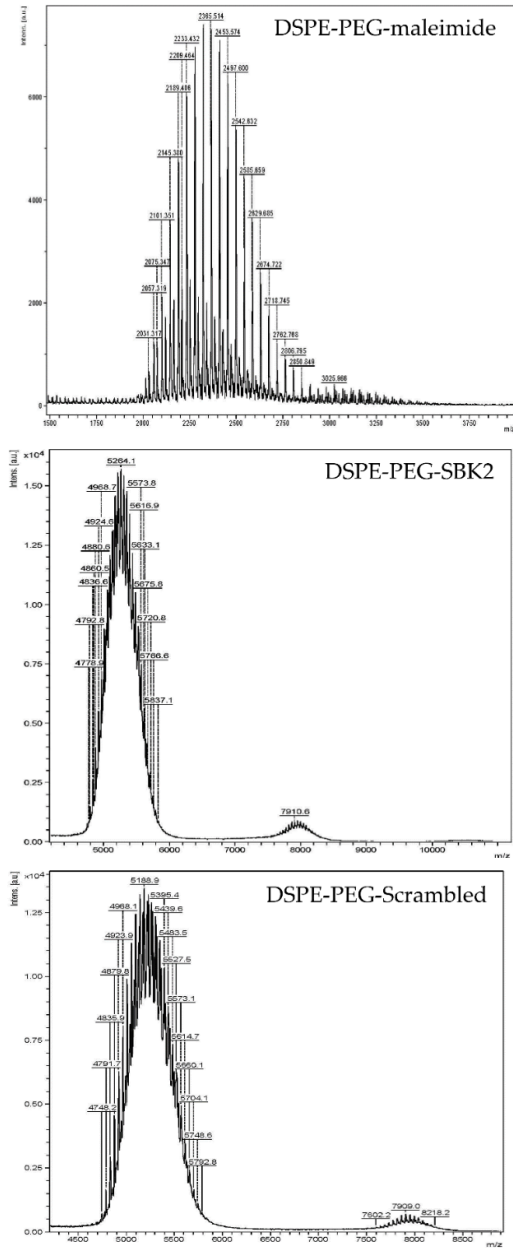

Supplement: ijms-22-01983-s001.pdf [file ijms-22-01983-s001.pdf]
